# Supplementary material for: Molecular Evolution of the Glycosyltransferase 6 Gene Family in Primates
Source: Hindawi journal article supplement (doi:10.1155/2016/9051727), 2016-01-01
Supplement: f1 [file 9051727.f1.pdf]

**Additional file**

Table S1 - Samples, their genbank/ Ensembl access numbers and phenotype

| <i>ABO</i>                        |                              |           |
|-----------------------------------|------------------------------|-----------|
| Accession number<br>NCBI/ Ensembl | Species                      | Phenotype |
| <b>PRIMATE</b>                    |                              |           |
| CERCOPITHECIDAE                   |                              |           |
| AH008342                          | <i>Macaca fascicularis</i>   | A         |
| XM_005580531                      | <i>Macaca fascicularis</i>   | B         |
| AH0082202                         | <i>Macaca fascicularis</i>   | O1        |
| NW_001101647                      | <i>Macaca mulatta</i>        | B         |
| XM_003918629                      | <i>Papio anubis</i>          | A         |
| AH0066972                         | <i>Papio anubis</i>          | B         |
| HOMINIDAE                         |                              |           |
| ENSGGOT00000032150                | <i>Gorilla gorilla</i>       | B         |
| NM_020469.2                       | <i>Homo sapiens</i>          | A1        |
| JN791441.1                        | <i>Homo sapiens</i>          | B         |
| AF021846                          | <i>Pan troglodytes</i>       | O         |
| ENSPTRT00000039844                | <i>Pan troglodytes</i>       |           |
| NM_001194925                      | <i>Pan troglodytes</i>       | A         |
| PLATYRRHINI                       |                              |           |
| XM_003732072                      | <i>Callithrix jacchus</i>    |           |
| XM_003732072                      | <i>Callithrix jacchus</i>    |           |
| XM_003732072                      | <i>Aotus nancymae</i>        |           |
| STREPSIRRHINI (PROSIMIANS)        |                              |           |
| NW_007079802                      | <i>Tarsius syrichta</i>      |           |
| ENSOGAT00000026266                | <i>Otolemur garnettii</i>    |           |
| RODENTIA                          |                              |           |
| NM_0307184                        | <i>Mus musculus</i>          |           |
| AF469946                          | <i>Rattus norvegicus</i>     | A         |
| LAGOMORPHA                        |                              |           |
| XM_002721538                      | <i>Oryctolagus cuniculus</i> |           |

| CARNIVORA                  |                                        |            |
|----------------------------|----------------------------------------|------------|
| XM_5483863                 | <i>Canis lupus familiaris</i>          | ABO1       |
| CETARTIDACTYLA             |                                        |            |
| NM_001077926               | <i>Bos taurus</i>                      |            |
| <i>GBGT1</i>               |                                        |            |
| Accession number           | Species                                | Phenotype  |
| NCBI/ Ensembl              |                                        |            |
| PRIMATE                    |                                        |            |
| CERCOPITHECIDAE            |                                        |            |
| ENSCSAT00000013238         | <i>Chlorocebus sabaues</i>             |            |
| ENSMMUT00000021419         | <i>Macaca mulatta</i>                  |            |
| ENSPANG00000018174         | <i>Papio anubis</i>                    |            |
| HOMINIDAE                  |                                        |            |
| XM_004048799               | <i>Gorilla gorilla</i>                 | Variant 1  |
| ENSGGOT00000003467         | <i>Gorilla gorilla</i>                 |            |
| NM_021996                  | <i>Homo sapiens</i>                    | Variant 1  |
| AY358175.1                 | <i>Homo sapiens</i>                    |            |
| ENSPTRT00000039837         | <i>Pan troglodytes</i>                 |            |
| ENSPPYT00000023030         | <i>Pongo abelii</i>                    |            |
| PLATYRRHINI                |                                        |            |
| XM_009004770.1             | <i>Callithrix jacchus</i>              | Variant X1 |
| XM_010346403.1             | <i>Saimiri boliviensis boliviensis</i> | Variant X1 |
| STREPSIRRHINI (PROSIMIANS) |                                        |            |
| NW_007079802.1             | <i>Tarsius syrichta</i>                |            |
| RODENTIA                   |                                        |            |
| NM_139197                  | <i>Mus musculus</i>                    |            |
| ENSCPOT00000004927         | <i>Cavia porcellus</i>                 |            |
| CARNIVORA                  |                                        |            |
| XM_014116859.1             | <i>Canis lupus familiaris</i>          |            |
| CETARTIDACTYLA             |                                        |            |
| ENSOART00000005732         | <i>Ovis aries</i>                      |            |
| <i>GGTA1</i>               |                                        |            |
| Accession number           | Species                                | Phenotype  |

| NCBI/ Ensembl              |                                        |                  |
|----------------------------|----------------------------------------|------------------|
| <b>PRIMATE</b>             |                                        |                  |
| CERCOPITHECIDAE            |                                        |                  |
| XM_011927427.1             | <i>Colobus angolensis palliatus</i>    | like             |
| HOMINIDAE                  |                                        |                  |
| XM_003777440.2             | <i>Pongo abelii</i>                    | like             |
| PLATYRRHINI                |                                        |                  |
| DQ985356.1                 | <i>Alouatta caraya</i>                 |                  |
| AF384428.1                 | <i>Callithrix jacchus</i>              |                  |
| AY034181.1                 | <i>Sapajus apella</i>                  |                  |
| XM_010335883               | <i>Saimiri boliviensis boliviensis</i> | Variant X1       |
| STREPSIRRHINI (PROSIMIANS) |                                        |                  |
| AY126667                   | <i>Lemur catta</i>                     |                  |
| DQ985357                   | <i>Loris tardigradus</i>               |                  |
| ENSOGAT00000001894         | <i>Otolemur garnettii</i>              |                  |
| ENSMICT00000016106         | <i>Microcebus murinus</i>              |                  |
| XM_008049783               | <i>Tarsius syrichta</i>                |                  |
| RODENTIA                   |                                        |                  |
| ENSSTOT00000005449         | <i>Ictidomys tridecemlineatus</i>      |                  |
| AF297615                   | <i>Mus musculus</i>                    |                  |
| AF488784                   | <i>Rattus norvegicus</i>               |                  |
| CARNIVORA                  |                                        |                  |
| XM_014116859.1             | <i>Canis lupus familiaris</i>          |                  |
| NP_001009308.1             | <i>Felis catus</i>                     |                  |
| LAGOMORPHA                 |                                        |                  |
| XM_002720464               | <i>Oryctolagus cuniculus</i>           |                  |
| CETARTIDACTYLA             |                                        |                  |
| XM_010810167               | <i>Bos taurus</i>                      |                  |
| AY447039                   | <i>Ovis aries</i>                      |                  |
| L36535                     | <i>Sus scrofa</i>                      |                  |
| <b>iGb3S</b>               |                                        |                  |
| <b>Accession number</b>    | <b>Species</b>                         | <b>Phenotype</b> |
| NCBI/ Ensembl              |                                        |                  |

| <b>PRIMATE</b>          |                                        |                  |
|-------------------------|----------------------------------------|------------------|
| <b>CERCOPITHECIDAE</b>  |                                        |                  |
| ENSCSAT00000017461      | <i>Chlorocebus sabaesus</i>            |                  |
| XM_005544050            | <i>Macaca fascicularis</i>             |                  |
| ENSMUT00000004622       | <i>Macaca mulatta</i>                  |                  |
| XM_003891544            | <i>Papio anubis</i>                    |                  |
| <b>HOMINIDAE</b>        |                                        |                  |
| ENST00000442999         | <i>Homo sapiens</i>                    |                  |
| ENSGGOT00000003612      | <i>Gorilla gorilla</i>                 |                  |
| ENSPPYT00000001874      | <i>Pongo abelii</i>                    |                  |
| <b>PLATYRRHINI</b>      |                                        |                  |
| ENSCJAT00000002165      | <i>Callithrix jacchus</i>              |                  |
| XM_003937545.1          | <i>Saimiri boliviensis boliviensis</i> |                  |
| <b>RODENTIA</b>         |                                        |                  |
| XM_003500624            | <i>Cricetulus griseus</i>              |                  |
| ENSMUST000000030585     | <i>Mus musculus</i>                    |                  |
| ENSRNOT00000007851      | <i>Rattus norvegicus</i>               |                  |
| <b>CARNIVORA</b>        |                                        |                  |
| XM_544424               | <i>Canis lupus familiaris</i>          |                  |
| <b>CETARTIDACTYLA</b>   |                                        |                  |
| XM_005203048            | <i>Bos taurus</i>                      |                  |
| <b>GT6m7</b>            |                                        |                  |
| <b>Accession number</b> | <b>Species</b>                         | <b>Phenotype</b> |
| <b>NCBI/ Ensembl</b>    |                                        |                  |
| <b>PRIMATE</b>          |                                        |                  |
| <b>CERCOPITHECIDAE</b>  |                                        |                  |
| NM_001283893            | <i>Macaca fascicularis</i>             |                  |
| ENSNLET000000011300     | <i>Nomascus leucogenys</i>             |                  |
| XM_008005684            | <i>Chlorocebus sabaesus</i>            | Variant_X1       |
| XM_009187871            | <i>Papio anubis</i>                    |                  |
| XM_010372750            | <i>Rhinopithecus roxellana</i>         |                  |
| <b>HOMINIDAE</b>        |                                        |                  |
| NM_182974               | <i>Homo sapiens</i>                    |                  |

|                            |                                        |            |
|----------------------------|----------------------------------------|------------|
| XM_002820374               | <i>Pongo abelii</i>                    |            |
| ENSGGOT00000007894         | <i>Gorilla gorilla</i>                 |            |
| XM_008970052               | <i>Pan paniscus</i>                    |            |
| XM_528458                  | <i>Pan troglodytes</i>                 |            |
| PLATYRRHINI                |                                        |            |
| XM_009005825               | <i>Callithrix jacchus</i>              |            |
| XM_003941373               | <i>Saimiri boliviensis boliviensis</i> |            |
| STREPSIRRHINI (PROSIMIANS) |                                        |            |
| XM_012782089.1             | <i>Microcebus murinus</i>              | Variant X1 |
| ENSOGAG00000030414         | <i>Otolemur garnettii</i>              |            |
| XM_008070666.1             | <i>Tarsius syrichta</i>                |            |
| XM_012654726.1             | <i>Propithecus coquereli</i>           |            |
| RODENTIA                   |                                        |            |
| NM_001039095               | <i>Mus musculus</i>                    |            |
| NM_001106559               | <i>Rattus norvegicus</i>               |            |
| CARNIVORA                  |                                        |            |
| XM_548383                  | <i>Canis lupus familiaris</i>          |            |
| CETARTIDACTYLA             |                                        |            |
| NM_001075928               | <i>Bos taurus</i>                      |            |
| ENSSSCG00000005758         | <i>Sus scrofa</i>                      |            |

Table S2 - Tests of positive selection codons in the *ABO* protein by pairs M0-M1a, M1a-M2a, M7-M8 and M8-M8a (PAML).

| Model | lnL <sup>a</sup> | df <sup>b</sup> | LRT <sup>c</sup> | Estimates of Parameters <sup>d,e</sup>                                                                 | Selected Sites | $\omega$ and SE |
|-------|------------------|-----------------|------------------|--------------------------------------------------------------------------------------------------------|----------------|-----------------|
| M0    | -4046.235        | 1               | 213.87**         | $\kappa= 3.591, \omega= 0.101$                                                                         | Not Allowed    |                 |
| M1a   | -3939.301        |                 |                  | $\kappa= 4.030, p_0= 0.825, p_1= 0.174, \omega_0= 0.048, \omega_1= 1.000$                              | Not Allowed    |                 |
|       |                  | 2               | 1.67             |                                                                                                        |                |                 |
| M2a   | -3938.466        |                 |                  | $\kappa= 4.027, p_0= 0.824, p_1= 0.170, p_2= 0.005, \omega_0= 0.048, \omega_1= 1.000, \omega_2= 4.053$ | None           |                 |
| M7    | -3909.200        |                 |                  | $\kappa= 3.821, p= 0.226, q= 1.409$                                                                    | Not Allowed    |                 |
|       |                  | 2               | 11.97**          |                                                                                                        |                |                 |
| M8    | -3903.215        |                 |                  | $\kappa= 3.828, p_0= 0.971, (p_1= 0.029), p= 0.290, q= 2.531, \omega= 1.732$                           | 266            | 1.717 +- 0.543  |
|       |                  |                 | 3.61*            |                                                                                                        |                |                 |
| M8a   | -3905.020        |                 |                  | $\kappa= 3.821, p_0= 0.956, (p_1= 0.044), p= 0.296, q= 2.902, \omega= 1.000$                           | None           |                 |

<sup>a</sup> The likelihood indicates the fit of the data to the different models; <sup>b</sup> Degree of freedom for  $\chi^2$  test; <sup>c</sup> Result of the Likelihood ratio test among the pair models M1a-M2a, M7-M8 and M8-M8a. \*Indicate statistically significant at 95% level and \*\*indicate statistically significant at 99% level ; <sup>d</sup> Pi denotes the proportion of sites falling in sites class  $\omega_1$ ; <sup>e</sup> Parameters  $p$  and  $q$  are the shape parameters of the beta distribution which underlies M7, M8 and M8a models

Table S3 - Results obtained by PARRIS for *ABO* protein (LRT = 0.00015)

| Null model (M1)        |       |       |           |                    |
|------------------------|-------|-------|-----------|--------------------|
| Rate Class             | 1     | 2     | Summary   |                    |
| $\omega$               | 0.05  | 1.00  | Mean :    | 0.237              |
| Prob.                  | 0.805 | 0.195 | Std.Dev : | 0.375              |
| Alternative model (M2) |       |       |           |                    |
| Rate Class             | 1     | 2     | 3         | Summary            |
| $\omega$               | 0.05  | 1.00  | 4.41      | Mean :<br>0.238    |
| Prob.                  | 0.805 | 0.195 | 0.000     | Std.Dev :<br>0.375 |

Table S4- Codons under positive selection obtained by Hyphy algorithms for *ABO* protein (values significant statistical are in highlighted in bold).

| Codon | SLAC<br>dN-dS | SLAC<br>p-value | FEL<br>dN-dS | FEL<br>p-value | MEME<br>$\omega^+$ | MEME<br>p-value | FUBAR<br>dN-dS | FUBAR<br>Post. Pr. |
|-------|---------------|-----------------|--------------|----------------|--------------------|-----------------|----------------|--------------------|
| 130   | -0.135        | 0.677           | -0.276       | 0.723          | >100               | <b>0.008</b>    | -0.102         | 0.312              |
| 268   | 0.738         | 0.571           | -0.283       | 0.776          | >100               | <b>0.002</b>    | -0.126         | 0.395              |

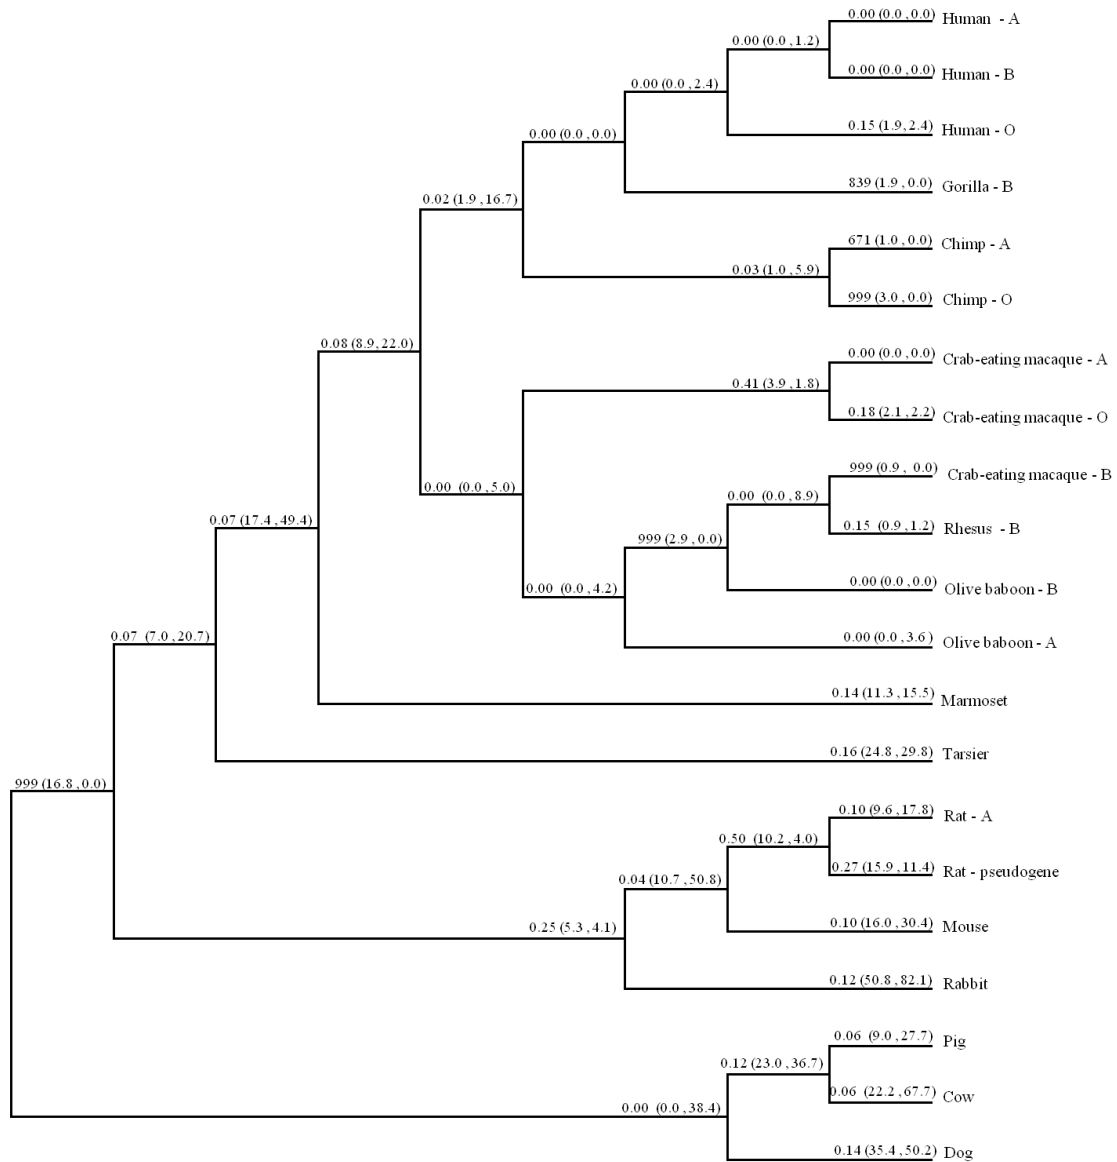

Figure S1 - Estimative of the Free-ratio model for the ABO protein. Samples with known phenotypes are indicated. The model estimated 594.1 and 116.9 nonsynonymous and synonymous sites, respectively. (M0 vs.Free-Ratio:  $\ln L = -4046.235288$  and  $4014.934$ , respectively;  $LRT = 62.6036$ ;  $df = 39$ ;  $0.01 < p < 0.05$ ). The values on each branches corresponding to  $\omega$ , nonsynonymous and synonymous sites, respectively.  $\omega$  values  $< 0.5$  indicate purifying selection,  $\omega$  values  $> 0.5$  is relaxed purifying selection and  $\omega$  values  $> 1.0$  is on positive selection.



Table S5- Tests of positive selection codons in the *Ggt1* protein by pairs M0-M1a, M1a-M2a, M7-M8 and M8-M8a (PAML).

| Model | lnL <sup>a</sup> | df <sup>b</sup> | LRT <sup>c</sup> | Estimates of Parameters <sup>d,e</sup>                                                                 | Selected Sites | $\omega$ and SE |
|-------|------------------|-----------------|------------------|--------------------------------------------------------------------------------------------------------|----------------|-----------------|
| M0    | -5363.619        | 1               | 116.52**         | $\kappa= 4.182, \omega= 0.264$                                                                         | Not Allowed    |                 |
| M1a   | -5305.348        |                 |                  | $\kappa= 4.417, p_0= 0.797, p_1= 0.202, \omega_0= 0.132, \omega_1= 1.000$                              | Not Allowed    |                 |
|       |                  | 2               | 0                |                                                                                                        |                |                 |
| M2a   | -5305.348        |                 |                  | $\kappa= 4.417, p_0= 0.797, p_1= 0.171, p_2= 0.031, \omega_0= 0.131, \omega_1= 1.000, \omega_2= 1.000$ | None           |                 |
| M7    | -5305.845        |                 |                  | $\kappa= 4.231, p= 0.458, q= 1.205$                                                                    | Not Allowed    |                 |
|       |                  | 2               | 6.37*            |                                                                                                        |                |                 |
| M8    | -5302.662        |                 |                  | $\kappa= 4.309, p_0= 0.927, (p_1= 0.073), p= 0.734, q= 2.727, \omega= 1.260$                           | 109            | 1.492 +- 0.159  |
|       |                  |                 | 0.308            |                                                                                                        |                |                 |
| M8a   | -5302.816        |                 |                  | $\kappa= 4.2934, p_0= 0.864, (p_1= 0.137), p= 0.989, q= 4.737, \omega= 1.000$                          | None           |                 |

<sup>a</sup> The likelihood indicates the fit of the data to the different models; <sup>b</sup> Degree of freedom for  $\chi^2$  test; <sup>c</sup> Result of the Likelihood ratio test among the pair models M1a-M2a, M7-M8 and M8-M8a. \*Indicate statistically significant at 95% level and \*\*indicate statistically significant at 99% level; <sup>d</sup> Pi denotes the proportion of sites falling in sites class  $\omega_1$ ; <sup>e</sup> Parameters  $p$  and  $q$  are the shape parameters of the beta distribution which underlies M7, M8 and M8a models

Table S6- Results obtained by PARRIS for *Ggtal* gene (LRT = -2.61186e-05).

| Null model (M1)        |       |       |                 |                 |
|------------------------|-------|-------|-----------------|-----------------|
| Rate Class             | 1     | 2     |                 |                 |
| $\omega$               | 0.12  | 1.00  | Mean : 0.354    |                 |
| Prob.                  | 0.732 | 0.268 | Std.Dev : 0.390 |                 |
| Alternative model (M2) |       |       |                 |                 |
| Rate Class             | 1     | 2     | 3               | Summary         |
| $\omega$               | 0.12  | 1.00  | 4.57            | Mean : 0.354    |
| Prob.                  | 0.732 | 0.268 | 0.000           | Std.Dev : 0.390 |

Table S7- Codons under positive selection obtained by Hyphy algorithms for *Ggtal* gene (values significant statistical are in highlighted in bold).

| Codon | SLAC dN-dS | SLAC p-value | FEL dN-dS | FEL p-value | MEME $\omega^+$ | MEME p-value | FUBAR dN-dS | FUBAR Post. Pr. |
|-------|------------|--------------|-----------|-------------|-----------------|--------------|-------------|-----------------|
| 82    | 2.012      | 0.249        | 3.036     | 0.072       | >100            | <b>0.012</b> | 0.639       | 0.925           |
| 92    | 1.349      | 0.389        | 1.786     | 0.378       | <b>57.251</b>   | <b>0.035</b> | 0.617       | 0.850           |
| 193   | 0.536      | 0.984        | 0.455     | 0.832       | >100            | <b>0.030</b> | -0.483      | 0.322           |
| 240   | 1.605      | 0.966        | 1.393     | 0.825       | >100            | <b>0.014</b> | -0.605      | 0.521           |
| 279   | 1.935      | 0.153        | 1.812     | 0.031       | >100            | <b>0.047</b> | 0.253       | 0.874           |

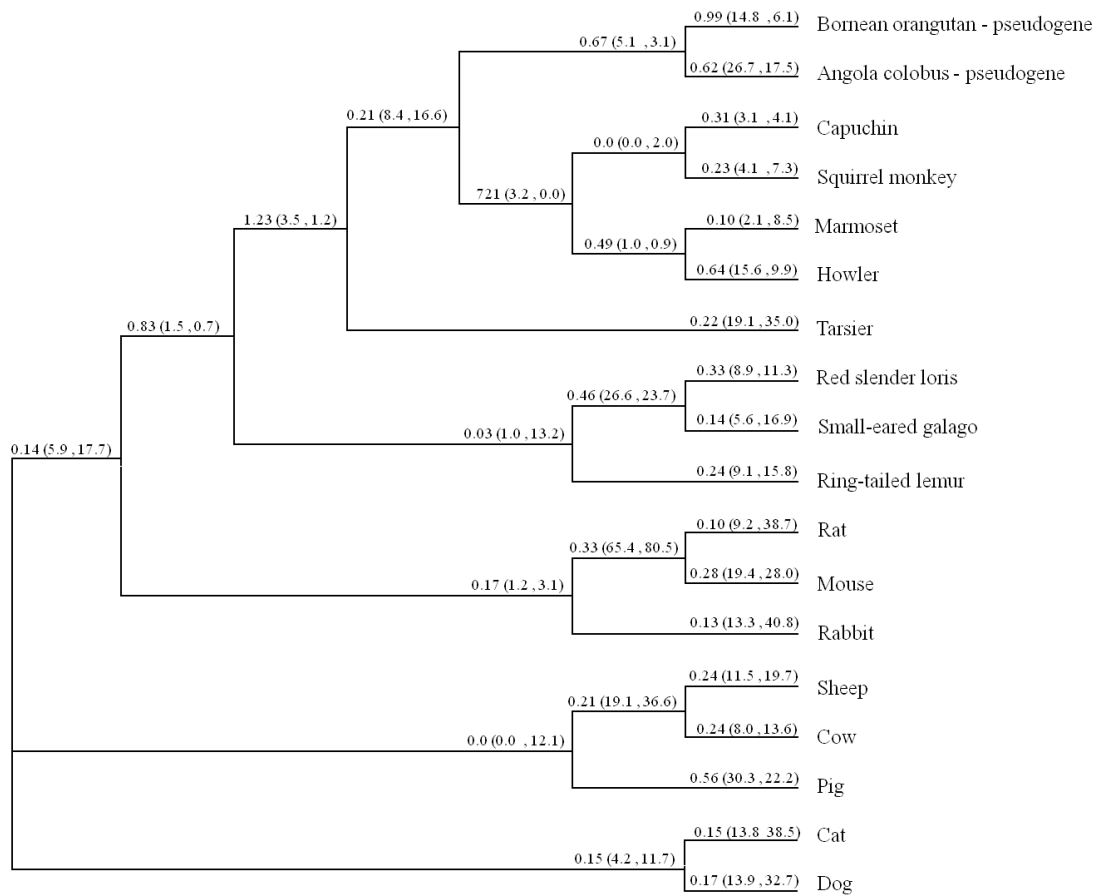

Figure S2 - Estimative of the Free-ratio model for the *Ggtal* gene. Samples with known phenotypes are indicated. The model estimated 697.3 and 286.7 nonsynonymous and synonymous sites, respectively. (M0 vs.Free-Ratio:  $\ln L = -5363.619$  and  $-5332.404$ , respectively; LRT = 62.433; df = 33;  $0.01 < P < 0.05$ ). The values on each branches corresponding to  $\omega$ , nonsynonymous and synonymous sites, respectively.  $\omega$  value  $< 0.5$  indicate purifying selection,  $\omega$  value  $> 0.5$  is relaxed purifying selection and  $\omega$  value  $> 1.0$  is positive selection.

Table S8- Tests of positive selection codons in the *iGb3S* gene by pairs M0-M1a, M1a-M2a, M7-M8 and M8-M8a (PAML).

| Model | lnL <sup>a</sup> | df <sup>b</sup> | LRT <sup>c</sup> | Estimates of Parameters <sup>d,e</sup>                                                                 | Selected Sites | $\omega$ and SE |
|-------|------------------|-----------------|------------------|--------------------------------------------------------------------------------------------------------|----------------|-----------------|
| M0    | -4244.063        | 1               | 94.85**          | $\kappa= 2.612, \omega= 0.241$                                                                         | Not Allowed    |                 |
| M1a   | -4196.640        | 2               | 0                | $\kappa= 2.721, p_0= 0.728, p_1= 0.272, \omega_0= 0.105, \omega_1= 1.000$                              | Not Allowed    |                 |
| M2a   | -4196.640        |                 |                  | $\kappa= 2.721, p_0= 0.728, p_1= 0.187, p_2= 0.085, \omega_0= 0.105, \omega_1= 1.000, \omega_2= 1.000$ | None           |                 |
| M7    | -4188.957        | 2               | 5.69             | $\kappa= 2.690, p= 0.364, q= 0.914$                                                                    | Not Allowed    |                 |
| M8    | -4186.112        |                 | 5.59**           | $\kappa= 2.688, p_0= 0.985, (p_1= 0.015), p= 0.427, q= 1.180, \omega= 3.433$                           | None           |                 |
| M8a   | -4188.905        |                 |                  | $\kappa= 2.688, p_0= 0.942, (p_1= 0.058), p= 0.414, q= 1.291, \omega= 1.000$                           | Not Allowed    |                 |

<sup>a</sup> The likelihood indicates the fit of the data to the different models; <sup>b</sup> Degree of freedom for  $\chi^2$  test; <sup>c</sup> Result of the Likelihood ratio test among the pair models M1a-M2a, M7-M8 and M8-M8a. \*Indicate statistically significant at 95% level and \*\*indicate statistically significant at 99% level ; <sup>d</sup> Pi denotes the proportion of sites falling in sites class  $\omega_i$ ; <sup>e</sup> Parameters  $p$  and  $q$  are the shape parameters of the beta distribution which underlies M7, M8 and M8a models

Table S9- Results obtained by PARRIS for *iGb3S* gene (LRT = -0.00025)

| Null model (M1)        |       |       |                   |                  |
|------------------------|-------|-------|-------------------|------------------|
| Rate Class             | 1     | 2     | Summary           |                  |
| $\omega$               | 0.13  | 1.00  | Mean<br>0.372     |                  |
| Prob.                  | 0.718 | 0.282 | Std.Dev:<br>0.394 |                  |
| Alternative model (M2) |       |       |                   |                  |
| Rate Class             | 1     | 2     | 3                 | Summary          |
| $\omega$               | 0.13  | 1.00  | 4.54              | Mean<br>0.371    |
| Prob.                  | 0.719 | 0.281 | 0.000             | Std.Dev<br>0.393 |

Table S10- Codons under positive selection obtained by Hyphy algorithms for *iGb3S* gene (values significant statistical are in highlighted in bold).

| Codon | SLAC<br>dN-dS | SLAC<br>p-value | FEL<br>dN-dS | FEL<br>p-value | MEME<br>$\omega^+$ | MEME<br>p-value | FUBAR<br>dN-dS | FUBAR<br>Post. Pr. |
|-------|---------------|-----------------|--------------|----------------|--------------------|-----------------|----------------|--------------------|
| 96    | 3.644         | 0.190           | <b>2.434</b> | <b>0.032</b>   | <b>&gt;100</b>     | <b>0.009</b>    | 0.218          | 0.878              |
| 135   | 1.044         | 0.544           | 1.635        | 0.542          | <b>&gt;100</b>     | <b>0.035</b>    | -0.071         | 0.501              |
| 228   | 1.654         | 0.383           | 1.112        | 0.220          | <b>&gt;100</b>     | <b>0.001</b>    | 0.048          | 0.620              |
| 233   | 2.664         | 0.281           | 4.846        | 0.112          | <b>&gt;100</b>     | <b>0.024</b>    | 0.567          | 0.853              |

Table S11- Tests of positive selection codons in the *GBGT1* gene by pairs M0-M1a, M1a-M2a, M7-M8 and M8-M8a (PAML).

| Model | lnL <sup>a</sup> | df <sup>b</sup> | LRT <sup>c</sup> | Estimates of Parameters <sup>d,e</sup>                                                                 | Selected Sites | $\omega$ and SE |
|-------|------------------|-----------------|------------------|--------------------------------------------------------------------------------------------------------|----------------|-----------------|
| M0    | -4055.301        | 1               | 89.85**          | $\kappa= 4.829, \omega=0.149$                                                                          | Not Allowed    |                 |
| M1a   | -4010.374        |                 |                  | $\kappa= 5.478, p_0= 0.839, p_1= 0.161, \omega_0= 0.082, \omega_1= 1.000$                              | Not Allowed    |                 |
|       |                  | 2               | 0                |                                                                                                        |                |                 |
| M2a   | -4010.374        |                 |                  | $\kappa= 5.478, p_0= 0.839, p_1= 0.116; p_2= 0.045, \omega_0= 0.082, \omega_1= 1.000, \omega_2= 1.000$ | None           |                 |
| M7    | -3998.633        |                 |                  | $\kappa= 5.223, p= 0.344, q= 1.581$                                                                    | Not Allowed    |                 |
|       |                  | 2               | 0.15             |                                                                                                        |                |                 |
| M8    | -3998.558        |                 |                  | $\kappa= 2.688, p_0= 0.978, (p_1= 0.021), p= 0.374, q= 1.926, \omega= 3.433$                           | None           |                 |
|       |                  |                 | 0.006            |                                                                                                        |                |                 |
| M8a   | -3998.561        |                 |                  | $\kappa= 5.223, p_0= 0.975, (p_1= 0.025), p= 0.375, q= 1.956, \omega= 1.000$                           | Not Allowed    |                 |

<sup>a</sup> The likelihood indicates the fit of the data to the different models; <sup>b</sup> Degree of freedom for  $\chi^2$  test; <sup>c</sup> Result of the Likelihood ratio test among the pair models M1a-M2a, M7-M8 and M8-M8a. \*Indicate statistically significant at 95% level and \*\*indicate statistically significant at 99% level; <sup>d</sup> Pi denotes the proportion of sites falling in sites class  $\omega_1$ ; <sup>e</sup> Parameters  $p$  and  $q$  are the shape parameters of the beta distribution which underlies M7, M8 and M8a models

Table S12- Results obtained by PARRIS for *GBGT1* gene (LRT = 0.0001)

| Null model (M1)        |       |       |                   |                  |
|------------------------|-------|-------|-------------------|------------------|
| Rate Class             | 1     | 2     | Mean              |                  |
| $\omega$               | 0.11  | 1.00  | 0.270             |                  |
| Prob.                  | 0.821 | 0.179 | Std.Dev:<br>0.341 |                  |
| Alternative model (M2) |       |       |                   |                  |
| Rate Class             | 1     | 2     | 3                 | Summary          |
| $\omega$               | 0.11  | 1.00  | 1.00              | Mean<br>0.271    |
| Prob.                  | 0.821 | 0.179 | 0.000             | Std.Dev<br>0.341 |

Table S13- Codons under positive selection obtained by Hyphy algorithms for *GBGT1* gene (values significant statistical are in highlighted in bold).

| Codon | SLAC<br>dN-dS | SLAC<br>p-value | FEL<br>dN-dS | FEL<br>p-value | MEME<br>$\omega^+$ | MEME<br>p-value | FUBAR<br>dN-dS | FUBAR<br>Post. Pr. |
|-------|---------------|-----------------|--------------|----------------|--------------------|-----------------|----------------|--------------------|
| 18    | -0.672        | 0.893           | -0.198       | 0.771          | >100               | <b>0.016</b>    | -0.077         | 0.262              |
| 21    | 2.061         | 0.599           | 1.241        | 0.405          | >100               | <b>0.018</b>    | -0.010         | 0.552              |
| 237   | -1.925        | 0.902           | -0.885       | 0.565          | <b>13.072</b>      | <b>0.046</b>    | -0.226         | 0.213              |
| 266   | -2.625        | 0.958           | -1.361       | 0.272          | <b>29.819</b>      | <b>0.025</b>    | -0.247         | 0.139              |

Table S14- Tests of positive selection codons in the *GT6m7* pseudogene by pairs by pair M0-M1a, M1a-M2a, M7-M8 and M8-M8a (PAML).

| Model | lnL <sup>a</sup> | df <sup>b</sup> | LRT <sup>c</sup> | Estimates of Parameters <sup>d,e</sup>                                                                 | Selected Sites | $\omega$ and SE |
|-------|------------------|-----------------|------------------|--------------------------------------------------------------------------------------------------------|----------------|-----------------|
| M0    | -4347.778        | 1               | 105.09**         | $\kappa= 3.096, \omega= 0.239$                                                                         | Not Allowed    |                 |
| M1a   | -4295.233        | 2               | 0                | $\kappa= 3.647, p_0= 0.637, p_1= 0.363, \omega_0= 0.139, \omega_1= 1.000$                              | Not Allowed    |                 |
| M2a   | -4295.233        |                 |                  | $\kappa= 3.647, p_0= 0.637, p_1= 0.309, p_2= 0.053, \omega_0= 0.139, \omega_1= 1.000, \omega_2= 1.000$ | None           |                 |
| M7    | -4262.267        | 2               | 0.002            | $\kappa= 3.298, p= 0.612, q= 1.560$                                                                    | Not Allowed    |                 |
| M8    | -4262.268        |                 |                  | $\kappa= 3.298, p_0= 0.999, (p_1= 0.00001), p= 0.612, q= 1.560, \omega= 1.000$                         | None           |                 |
|       |                  |                 | 0.18             |                                                                                                        |                |                 |
| M8a   | -4262.178        |                 |                  | $\kappa= 3.296, p_0= 0.999, (p_1= 0.00001), p= 0.609, q= 1.558, \omega= 1.000$                         | Not Allowed    |                 |

<sup>a</sup> The likelihood indicates the fit of the data to the different models; <sup>b</sup> Degree of freedom for  $\chi^2$  test; <sup>c</sup> Result of the Likelihood ratio test among the pair models M1a-M2a, M7-M8 and M8-M8a. \*Indicate statistically significant at 95% level and \*\*indicate statistically significant at 99% level ;<sup>d</sup> Pi denotes the proportion of sites falling in sites class  $\omega_1$ ; <sup>e</sup> Parameters  $p$  and  $q$  are the shape parameters of the beta distribution which underlies M7, M8 and M8a models



Table S15- Results obtained by PARRIS for *GT6m7* pseudogene (LRT = -0.0021)

| Null model (M1)        |       |       |                  |                  |
|------------------------|-------|-------|------------------|------------------|
| Rate Class             | 1     | 2     | Summary          |                  |
| $\omega$               | 0.13  | 1.00  | Mean<br>0.475    |                  |
| Prob.                  | 0.603 | 0.397 | Std.Dev<br>0.427 |                  |
| Alternative model (M2) |       |       |                  |                  |
| Rate Class             | 1     | 2     | 3                | Summary          |
| $\omega$               | 0.13  | 1.00  | 4.42             | Mean<br>0.475    |
| Prob.                  | 0.602 | 0.398 | 0.000            | Std.Dev<br>0.427 |

Table S16- Codons under positive selection obtained by Hyphy algorithms for *GT6m7* pseudogene (values significant statistical are in highlighted in bold).

| Codon     | SLAC<br>dN-dS | SLAC<br>p-value | FEL<br>dN-dS | FEL<br>p-value | MEME<br>$\omega^+$ | MEME<br>p-value | FUBAR<br>dN-dS | FUBAR<br>Post. Pr. |
|-----------|---------------|-----------------|--------------|----------------|--------------------|-----------------|----------------|--------------------|
| 5         | -0.191        | 0.845           | -0.093       | 0.736          | >100               | <b>0.002</b>    | -0.054         | 0.304              |
| 6         | 0.494         | 0.345           | 0.516        | 0.254          | >100               | <b>0.001</b>    | -0.022         | 0.623              |
| 12        | 0.648         | 0.208           | <b>0.492</b> | <b>0.052</b>   | >100               | <b>0.071</b>    | 0.135          | 0.842              |
| 42        | -0.018        | 0.698           | -0.057       | 0.916          | >100               | <b>0.009</b>    | -0.066         | 0.334              |
| 88        | 0.799         | 0.125           | 0.639        | 0.039          | >100               | <b>0.046</b>    | 0.155          | 0.857              |
| <b>96</b> | <b>1.277</b>  | <b>0.048</b>    | <b>1.149</b> | <b>0.017</b>   | >100               | <b>0.021</b>    | 0.495          | <b>0.960</b>       |
| 105       | -0.374        | 0.900           | -0.310       | 0.350          | >100               | <b>0.002</b>    | -0.121         | 0.179              |
| 107       | 0.066         | 0.610           | -0.047       | 0.941          | >100               | <b>0.034</b>    | -0.025         | 0.468              |

Figure S3- Alignment obtained by BLASTN Ensembl of intron 2 of the GT6M7 (query sequence) against Human GRCh38. Are shown the four best hits. (A) Intron2 against ADGRL3-AS1; (B) Intron2 against RUNX1 (C) Intron2 against SRBD1; (D) Intron2 against CTNND2 and (E) Intron2 against FEZ2. The exon is highlighted in red FEZ2.

A)

```

BLAST/BLAT type: BLASTN
Query location:1 768 to 1117 (+)
Database locatin: 4 62101554 to 62101904 (+)
Genomic location: 4 62101554 to 62101904 (+)
Alignment score: 490
E-value: 1e-133
Alignment length: 351
Percentage identity: 92.88

Query   Query_1:   768 TATGGTTTGGCTCTTTCCCCACCCAAATCTCAACTTGAATTGTATCTCCAGAATTCCCA Query_1:   827
          |||
Subject 4:62101554 TATGGTTTGGCTGTGTCCCCACCCAAATCTCAACTTGAACTGTATCTCCAGAATTCCCA 4:62101613

Query   Query_1:   828 CGTGTGTGGGAGGGACCC-GGGGGAGGTAATTGAATCATGGGGCTGGTCTTTCCCATG Query_1:   887
          |||
Subject 4:62101614 TGTGTGTGGGAGGGACCCAGGGGGAGGTAATTGAATCATGGGGACTGGTCTTTCCCATG 4:62101673

Query   Query_1:   888 CTATTCTCATGATAGTGAATACGTCTCATGAGATCTGATGGGTTTATCAGGGGTTCCAC Query_1:   947
          |||
Subject 4:62101674 CTATTCTCATGATAGTGAATAAGTCTCATGAGATCTGATGGGTTTATCAGAGGTTCCGC 4:62101733

Query   Query_1:   948 TTTTCCGTCTTCTCATTTTCTCTTGCCGCTGCCATGGAAGACATGCCTTTTGCCTCCTG Query_1:  1007
          |||
Subject 4:62101734 TTTTGCTTCTTCTCATTTTCTCTTGCCGCCACCATGTAAGAAGTGCCTTTTACCTCCTG 4:62101793

Query   Query_1:  1008 CCATGATTCTGAGGCTCCCCAGCCATGTGGAAGTGAAGTCCAATTAACCTCTTTTTC Query_1:  1067
          |||
Subject 4:62101794 CCATGATTTTGAACCTCCCCAGCCATGTGGAAGTGAAGTCCAATTAACCTCTTTTTC 4:62101853

Query   Query_1:  1068 TTCCAGTCTTGGGTATGTCTTTATCAGCAGCGTAAAAACAGACTAATACA Query_1:  1118
          |||
Subject 4:62101854 TTCCAGTCTCGGGTATGTCTTTATCAGCAGCATAAAAACAGACTAATACA 4:62101905

```
